# Supplementary material for: Chiroptical, ESMS and NMR spectroscopic study of the interaction of enantiopure lanthanide complexes with selected self-complementary dodecamer oligonucleotides†
Source: Royal Society of Chemistry journal article supplement (doi:10.1039/b104796p), 2001-01-01
Supplement: b104796p_a.doc [file b104796p_a.doc]

# Supplementary data

**Fig. S1** Change in absorbance at 321 nm for  (circles) or -[Eu.**4**]4+ (21M, pH 7.4, 10mM HEPSE, 10mM NaCl, 295K), following addition of duplex (CG)6.

**Table S1/Table S2** Spreadsheet of representative data showing changes in absorbance (321 nm), fluorescence emission (405nm) and Eu emission intensity (595 nm) following addition of the duplex (CG)6 oligonucleotide to  and -[Eu.**4**]4+.

**Fig. S2**/**Table S3** Variation of fluorescence emission intensity following addition of duplex (CG)6 to -[Eu.**4**]4+.

**Fig. S3**/**Table S4** Intrinsic method of analysis showing the relation between the concentration of bound complex and the intensity of fluorescence.

**Fig. S4** Full McGhee-von Hippel plot defining the binding with the -[Eu.**4**]4+ complex

**Fig. S5**/**Table S5** Truncated McGhee von Hippel analysis showing the central portion of the curve, and associated data.

**Table S6** Summary of TOCSY- 1-H NMR study following addition of 0.01 to 0.25 equivalents of -[Gd.**4**]4+ to duplex (CGCGAATTCGCG) showing changes in observed cross peaks ( a tick indicates still observed strongly , i.e. >50% of original cross peak intensity), a dash indicates still observable and a space indicates not observed.

**Table S7** Summary of TOCSY- 1-H NMR study following addition of 0.01 to 0.25 equivalents of -[Gd.**4**]4+ to duplex (CGCGAATTCGCG) showing changes in observed cross peaks ( a tick indicates still observed strongly , i.e. >50% of original cross peak intensity), a dash indicates still observable and a space indicates not observed.

**Table S8** Summary of NOESY- 1-H NMR study following addition of 0.1 to 0.25 equivalents of -[Eu.**4**]4+ to duplex (CGCGAATTCGCG) showing changes in observed cross peaks ( a tick indicates still observed strongly , i.e. >50% of original cross peak intensity, a dash indicates still observable and a space indicates not observed).

**Table S9/Table S10** Summary of NOESY- 1-H NMR study following addition of 0.01 to 0.25 equivalents of  and -[Gd.**4**]4+ to duplex (CGCGAATTCGCG) showing changes in observed cross peaks ( a tick indicates still observed strongly , i.e. >50% of original cross peak intensity), a dash indicates still observable and a space indicates not observed.

**Fig. S6/Fig. S7** 1-H NMR NOESY spectra and a graphical analysis of changes in observed cross peak intensity (500MHz, 295K, pD 7.3, 0.7mM oligonucleotide) showing selected spectral regions of duplex (CGCGAATTCGCG) following addition of 0.02, 0.05 and 0.1 equivalents of -[Gd.**4**]4+.
