# Supplementary material for: Chiroptical, ESMS and NMR spectroscopic study of the interaction of enantiopure lanthanide complexes with selected self-complementary dodecamer oligonucleotides†
Source: Royal Society of Chemistry journal article supplement (doi:10.1039/b104796p), 2001-01-01

SSS ( $\Delta$ ) + (CG)<sub>6</sub> : "intrinsic method" for determination of  $\alpha$ , relating [bound complex] to  $\Delta I_{fi}$ . Equation of best-fit line:  $y = 484x + 0.011$

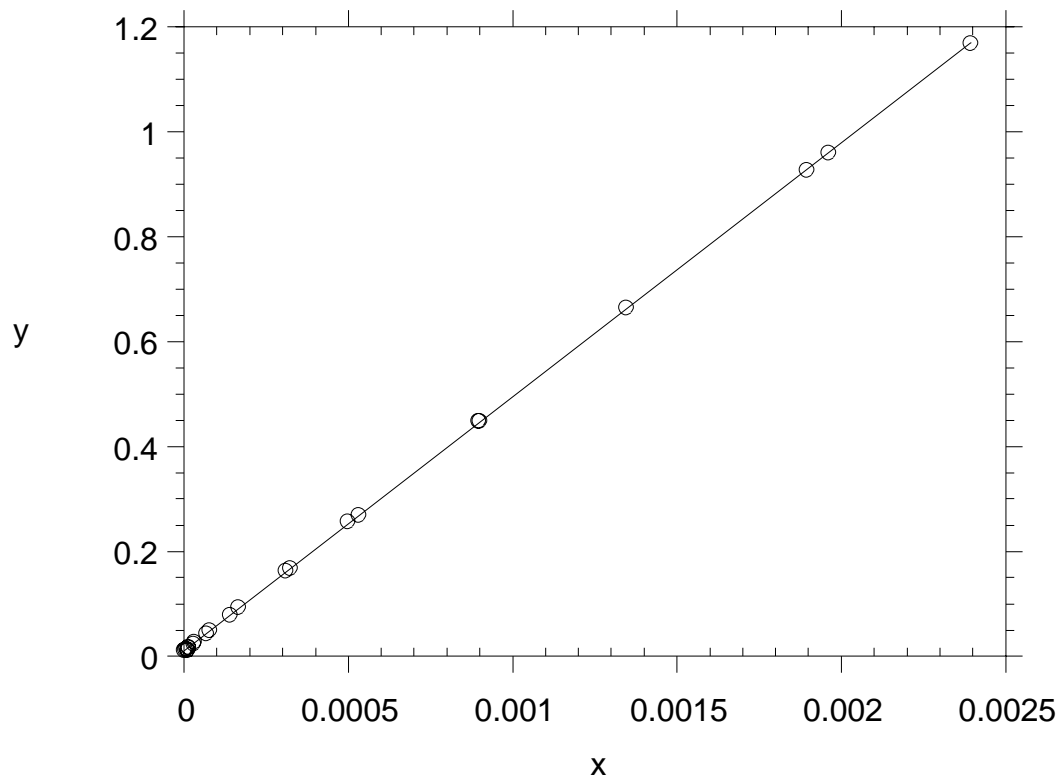

Supplement: b104796p_d.pdf [file b104796p_d.pdf]
