# Supplementary material for: Chiroptical, ESMS and NMR spectroscopic study of the interaction of enantiopure lanthanide complexes with selected self-complementary dodecamer oligonucleotides†
Source: Royal Society of Chemistry journal article supplement (doi:10.1039/b104796p), 2001-01-01
Supplement: b104796p_m.pdf [file b104796p_m.pdf]

|    | [duplex]/micM | delta I-fl | Lb     | $v=Lb/[CG6]$ | L (free) | v/L     |
|----|---------------|------------|--------|--------------|----------|---------|
| 0  | 0.53750       | 51.000     | 2.4862 | 4.6256       | 21.114   | 0.21908 |
| 1  | 1.0755        | 97.000     | 4.7288 | 4.3968       | 18.871   | 0.23299 |
| 2  | 1.6130        | 148.00     | 7.2150 | 4.4730       | 16.385   | 0.27300 |
| 3  | 2.1505        | 189.00     | 9.2137 | 4.2845       | 14.386   | 0.29782 |
| 4  | 2.6885        | 237.00     | 11.554 | 4.2975       | 12.046   | 0.35675 |
| 5  | 3.2260        | 277.00     | 13.504 | 4.1859       | 10.096   | 0.41460 |
| 6  | 3.7635        | 319.00     | 15.551 | 4.1321       | 8.0487   | 0.51339 |
| 7  | 4.3015        | 352.00     | 17.160 | 3.9893       | 6.4400   | 0.61946 |
| 8  | 4.8375        | 383.00     | 18.671 | 3.8597       | 4.9288   | 0.78310 |
| 9  | 5.3750        | 405.50     | 19.768 | 3.6778       | 3.8319   | 0.95979 |
| 10 | 5.9125        | 425.60     | 20.748 | 3.5092       | 2.8520   | 1.2304  |
| 11 | 6.4500        | 438.00     | 21.353 | 3.3105       | 2.2475   | 1.4730  |
| 12 | 6.9875        | 448.80     | 21.879 | 3.1312       | 1.7210   | 1.8194  |
| 13 | 7.5250        | 455.60     | 22.211 | 2.9516       | 1.3895   | 2.1242  |
| 14 | 8.0625        | 461.40     | 22.493 | 2.7899       | 1.1068   | 2.5208  |
| 15 | 8.6000        | 464.60     | 22.649 | 2.6336       | 0.95075  | 2.7701  |
| 16 | 9.1375        | 467.90     | 22.810 | 2.4963       | 0.78987  | 3.1604  |
| 17 | 9.6750        | 469.90     | 22.908 | 2.3677       | 0.69237  | 3.4197  |
| 18 | 10.212        | 472.00     | 23.010 | 2.2531       | 0.59000  | 3.8189  |
| 19 | 10.750        | 473.20     | 23.069 | 2.1459       | 0.53150  | 4.0375  |
| 20 | 11.288        | 474.40     | 23.127 | 2.0489       | 0.47300  | 4.3317  |
| 21 | 11.825        | 475.21     | 23.166 | 1.9591       | 0.43351  | 4.5191  |
| 22 | 12.363        | 475.79     | 23.195 | 1.8762       | 0.40524  | 4.6299  |
| 23 | 12.900        | 476.35     | 23.222 | 1.8002       | 0.37794  | 4.7631  |
| 24 | 13.438        | 476.81     | 23.244 | 1.7298       | 0.35551  | 4.8657  |

## Summary of TOCSY interactions

| Base | Cross Peaks | Equiv. of $\Lambda$ -Gd added |      |      |     |      |
|------|-------------|-------------------------------|------|------|-----|------|
|      |             | 0.01                          | 0.02 | 0.05 | 0.1 | 0.25 |
| C1   | C1'H/C2'H   | ✓                             | ✓    | ✓    |     |      |
|      | C1'H/C2''H  | ✓                             | ✓    | ✓    |     |      |
|      | C2'H/C2''H  | ✓                             | ✓    | ✓    | ✓   |      |
|      | C6H/C5H     | ✓                             | ✓    | ✓    | ✓   | ✓    |
| G2   | C1'H/C2'H   | ✓                             | ✓    | ✓    | -   | -    |
|      | C1'H/C2''H  | ✓                             | ✓    | ✓    | -   | -    |
| C3   | C1'H/C2'H   | ✓                             | ✓    |      |     |      |
|      | C1'H/C2''H  | ✓                             | ✓    |      |     |      |
|      | C2'H/C2''H  | ✓                             |      |      |     |      |
|      | C6H/C5H     | ✓                             | ✓    | ✓    | -   |      |
| G4   | C1'H/C2'H   | ✓                             | ✓    |      |     |      |
|      | C1'H/C2''H  | ✓                             | ✓    | -    |     |      |
| A5   | C1'H/C2'H   | ✓                             | ✓    |      |     |      |
|      | C1'H/C2''H  | ✓                             | ✓    |      |     |      |
|      | C2'H/C2''H  | ✓                             | -    |      |     |      |
| A6   | C1'H/C2'H   | ✓                             | ✓    |      |     |      |
|      | C1'H/C2''H  | ✓                             | -    |      |     |      |
|      | C2'H/C2''H  |                               |      |      |     |      |
| T7   | C1'H/C2'H   | ✓                             |      |      |     |      |
|      | C1'H/C2''H  | -                             | ✓    |      |     |      |
|      | C2'H/C2''H  | ✓                             |      |      |     |      |
| T8   | C1'H/C2'H   | ✓                             | ✓    |      |     |      |
|      | C1'H/C2''H  | ✓                             | -    |      |     |      |
|      | C2'H/C2''H  | ✓                             | -    |      |     |      |
| C9   | C1'H/C2'H   | ✓                             | ✓    | -    |     |      |
|      | C1'H/C2''H  | ✓                             | ✓    |      |     |      |
|      | C2'H/C2''H  | ✓                             | -    |      |     |      |
|      | C6H/C5H     | ✓                             | ✓    | ✓    | -   |      |
| G10  | C1'H/C2'H   | ✓                             | ✓    | ✓    | -   | -    |
|      | C1'H/C2''H  | ✓                             | ✓    | ✓    | -   | -    |
| C11  | C1'H/C2'H   | ✓                             | ✓    | ✓    | -   |      |
|      | C1'H/C2''H  | ✓                             | ✓    |      |     |      |
|      | C2'H/C2''H  | ✓                             | ✓    |      |     |      |
|      | C6H/C5H     | ✓                             | ✓    | ✓    | ✓   |      |
| G12  | C1'H/C2'H   | ✓                             | ✓    | ✓    |     |      |
|      | C1'H/C2''H  | ✓                             | ✓    | ✓    |     |      |
|      | C2'H/C2''H  | ✓                             | ✓    | ✓    |     |      |

## Summary of TOCSY interactions

| Base | Cross Peaks | Amount of $\Delta$ -Gd added |      |      |     |      |
|------|-------------|------------------------------|------|------|-----|------|
|      |             | 0.01                         | 0.02 | 0.05 | 0.1 | 0.25 |
| C1   | C1'H/C2'H   | ✓                            | ✓    | -    |     |      |
|      | C1'H/C2''H  | ✓                            | ✓    | -    |     |      |
|      | C6H/C5H     | ✓                            | ✓    | ✓    | -   | -    |
| G2   | C1'H/C2'H   | ✓                            | ✓    | ✓    |     |      |
|      | C1'H/C2''H  | ✓                            | ✓    | ✓    |     |      |
| C3   | C1'H/C2'H   |                              |      |      |     |      |
|      | C1'H/C2''H  |                              |      |      |     |      |
|      | C6H/C5H     | ✓                            | ✓    | -    | -   | -    |
| G4   | C1'H/C2'H   |                              |      |      |     |      |
|      | C1'H/C2''H  |                              |      |      |     |      |
| A5   | C1'H/C2'H   |                              |      |      |     |      |
|      | C1'H/C2''H  |                              |      |      |     |      |
| A6   | C1'H/C2'H   |                              |      |      |     |      |
|      | C1'H/C2''H  |                              |      |      |     |      |
| T7   | C1'H/C2'H   |                              |      |      |     |      |
|      | C1'H/C2''H  |                              |      |      |     |      |
| T8   | C1'H/C2'H   |                              |      |      |     |      |
|      | C1'H/C2''H  |                              |      |      |     |      |
| C9   | C1'H/C2'H   | ✓                            |      | -    |     |      |
|      | C1'H/C2''H  | ✓                            |      |      |     |      |
|      | C6H/C5H     | ✓                            | ✓    | ✓    | ✓   | -    |
| G10  | C1'H/C2'H   | ✓                            | ✓    | ✓    |     |      |
|      | C1'H/C2''H  | ✓                            | ✓    | ✓    |     |      |
| C11  | C1'H/C2'H   | ✓                            |      |      |     |      |
|      | C1'H/C2''H  | ✓                            |      |      |     |      |
|      | C6H/C5H     | ✓                            | ✓    | ✓    | ✓   | ✓    |
| G12  | C1'H/C2'H   | ✓                            | ✓    | -    |     |      |
|      | C1'H/C2''H  | ✓                            | ✓    | ✓    |     |      |

# Summary of NOESY interactions

| Base | Cross Peaks |          | Equiv. of $\Delta$ -Eu added |      |     |   | ( $\Delta$ -Eu) |
|------|-------------|----------|------------------------------|------|-----|---|-----------------|
|      |             |          | 0.1                          | 0.25 | 0.5 | 1 | 0.25            |
| C1   | C2'H        | C6H      | ✓                            | ✓    | ✓   | ✓ | ✓               |
|      | C2''H       | C1'H     |                              | ✓    | ✓   | ✓ |                 |
| G2   | C2'H        | C8H      | ✓                            | ✓    | ✓   | ✓ | ✓               |
|      | C2''H       | C8H      | ✓                            | ✓    | ✓   | ✓ | ✓               |
|      | C2'H        | C1'H     | ✓                            | ✓    | ✓   | ✓ | ✓               |
|      | C2''H       | C1'H     | ✓                            | ✓    | ✓   | ✓ | ✓               |
| C3   | C2'H        | C6H      | ✓                            | -    | -   |   | ✓               |
|      | C2''H       | C1'H     | ✓                            | ✓    | -   |   |                 |
| G4   | C2'H        | C1'H     |                              |      |     |   |                 |
|      | C2''H       | C1'H     |                              |      |     |   |                 |
| A5   | C2'H        | C8H      |                              |      |     |   |                 |
|      | C2''H       | C8H      |                              |      |     |   |                 |
|      | C2''H       | C1'H     |                              |      |     |   |                 |
| A6   | C2'H        | C8H      |                              |      |     |   |                 |
|      | C2''H       | C8H      |                              |      |     |   |                 |
|      | C2''H       | C6H (T7) |                              |      |     |   |                 |
|      | C2'H        | C1'H     |                              |      |     |   |                 |
| T7   | C2''H       | C1'H     |                              |      |     |   |                 |
|      | C2'H        | C6H      |                              |      |     |   |                 |
|      | C2''H       | C6H      |                              |      |     |   |                 |
| T8   | C2''H       | C1'H     |                              |      |     |   |                 |
|      | C2'H        | C6H      | -                            |      |     |   |                 |
|      | C2''H       | C6H      | ✓                            |      |     |   |                 |
| C9   | C2''H       | C1'H     |                              |      |     |   |                 |
|      | C2'H        | C6H      | ✓                            |      |     |   | ✓               |
|      | C2''H       | C1'H     |                              |      |     |   |                 |
| G10  | C2'H        | C8H      | ✓                            | ✓    |     | ✓ | ✓               |
|      | C2''H       | C8H      | ✓                            | ✓    |     | ✓ | ✓               |
|      | C2'H        | C1'H     | ✓                            | ✓    | ✓   | ✓ | ✓               |
| C11  | C2''H       | C1'H     | ✓                            | ✓    | ✓   | ✓ | ✓               |
|      | C2'H        | C6H      | ✓                            | ✓    | ✓   |   | ✓               |
| G12  | C2''H       | C1'H     | ✓                            | ✓    | ✓   | - | ✓               |
|      | C2'H        | C8H      |                              | ✓    |     | - | ✓               |
|      | C2''H       | C8H      | ✓                            | ✓    | ✓   | ✓ | ✓               |

# Summary of NOESY interactions

| Base | Cross Peaks |          | Equiv. of $\Delta$ -Gd added |      |      |     |
|------|-------------|----------|------------------------------|------|------|-----|
|      |             |          | 0.01                         | 0.02 | 0.05 | 0.1 |
| C1   | C2'H        | C6H      | ✓                            | ✓    | ✓    |     |
|      | C2''H       | C1'H     | ✓                            | ✓    |      |     |
| G2   | C2'H        | C8H      | ✓                            | ✓    | -    | -   |
|      | C2''H       | C8H      | ✓                            | ✓    | -    | -   |
|      | C2'H,       | C1'H     | ✓                            | ✓    | -    |     |
|      | C2''H       | C1'H     | ✓                            | ✓    | -    |     |
| C3   | C2'H        | C6H      | ✓                            | -    |      |     |
|      | C2''H       | C1'H     | ✓                            | ✓    | -    |     |
| G4   | C2'H        | C1'H     | -                            | -    |      |     |
|      | C2''H       | C1'H     | ✓                            | ✓    |      |     |
| A5   | C2'H        | C8H      | ✓                            | ✓    | -    |     |
|      | C2''H       | C8H      | ✓                            | ✓    |      |     |
|      | C2''H       | C1'H     | -                            | -    |      |     |
| A6   | C2'H        | C8H      | ✓                            | ✓    |      |     |
|      | C2''H       | C8H      | ✓                            | ✓    |      |     |
|      | C2''H       | C6H (T7) | -                            | -    |      |     |
|      | C2'H        | C1'H     | -                            | -    |      |     |
|      | C2''H       | C1'H     | -                            | -    |      |     |
| T7   | C2'H        | C6H      | -                            | -    | -    |     |
|      | C2''H       | C6H      | -                            | -    |      |     |
|      | C2''H       | C1'H     | ✓                            | ✓    |      |     |
| T8   | C2'H        | C6H      | ✓                            | ✓    | -    |     |
|      | C2''H       | C6H      | ✓                            | ✓    |      |     |
|      | C2''H       | C1'H     | -                            | -    |      |     |
| C9   | C2'H        | C6H      | ✓                            | ✓    | -    |     |
|      | C2''H       | C1'H     | ✓                            | -    | -    |     |
| G10  | C2''H       | C8H      | ✓                            | ✓    | -    | -   |
|      | C2'H        | C1'H     | ✓                            | ✓    | -    | -   |
|      | C2''H       | C1'H     | ✓                            | ✓    | -    | -   |
| C11  | C2'H        | C6H      | ✓                            | ✓    |      |     |
|      | C2''H       | C1'H     | ✓                            | ✓    | -    | -   |
| G12  | C2''H       | C1'H     | ✓                            | ✓    | -    | -   |
|      | C2'H        | C8H      |                              | ✓    | -    |     |
|      | C2''H       | C8H      | ✓                            | ✓    | -    | -   |

# Summary of NOESY interactions

| Base | Cross Peaks |          | Equiv. of $\Lambda$ -Gd added |      |      |     |      |
|------|-------------|----------|-------------------------------|------|------|-----|------|
|      |             |          | 0.01                          | 0.02 | 0.05 | 0.1 | 0.25 |
| C1   | C2'H        | C6H      | ✓                             | ✓    |      | ✓   |      |
|      | C2''H       | C1'H     |                               | ✓    | ✓    |     |      |
| G2   | C2'H        | C8H      | ✓                             | ✓    | ✓    | ✓   | ✓    |
|      | C2''H       | C8H      | ✓                             | ✓    | ✓    | ✓   | ✓    |
|      | C2'H        | C1'H     | ✓                             | ✓    | ✓    | ✓   |      |
|      | C2''H       | C1'H     | ✓                             | ✓    | ✓    | ✓   |      |
| C3   | C2'H        | C6H      | ✓                             | ✓    | ✓    | -   |      |
|      | C2''H       | C1'H     | ✓                             | ✓    | ✓    |     |      |
| G4   | C2'H        | C1'H     |                               | ✓    | ✓    |     |      |
|      | C2''H       | C1'H     | ✓                             | ✓    | -    |     |      |
| A5   | C2'H        | C8H      | ✓                             | ✓    | ✓    | ✓   |      |
|      | C2''H       | C8H      | ✓                             | ✓    | ✓    | ✓   |      |
| A6   | C2''H       | C1'H     | ✓                             | ✓    | -    |     |      |
|      | C2'H        | C8H      |                               | ✓    | ✓    |     |      |
|      | C2''H       | C8H      |                               |      |      |     |      |
|      | C2''H       | C6H (T7) |                               | ✓    |      |     |      |
|      | C2'H        | C1'H     |                               |      |      |     |      |
| T7   | C2'H        | C6H      | ✓                             | ✓    | ✓    | -   |      |
|      | C2''H       | C6H      | ✓                             |      | -    |     |      |
|      | C2''H       | C1'H     | ✓                             | ✓    |      |     |      |
| T8   | C2'H        | C6H      | ✓                             | ✓    | ✓    |     |      |
|      | C2''H       | C6H      | ✓                             | ✓    | ✓    | ✓   |      |
|      | C2''H       | C1'H     |                               | ✓    |      |     |      |
| C9   | C2'H        | C6H      | ✓                             | ✓    | ✓    | ✓   |      |
|      | C2''H       | C1'H     | ✓                             | ✓    | ✓    |     |      |
| G10  | C2''H       | C8H      | ✓                             | ✓    | ✓    | ✓   | ✓    |
|      | C2'H        | C1'H     | ✓                             | ✓    | ✓    | ✓   |      |
|      | C2''H       | C1'H     | ✓                             | ✓    | ✓    | ✓   |      |
| C11  | C2'H        | C6H      | ✓                             | ✓    | ✓    | ✓   |      |
|      | C2''H       | C1'H     | ✓                             | ✓    | ✓    |     |      |
| G12  | C2''H       | C1'H     | ✓                             | ✓    | ✓    | ✓   |      |
|      | C2'H        | C8H      |                               | ✓    | ✓    |     |      |
| G12  | C2''H       | C8H      | ✓                             | ✓    | ✓    | ✓   | ✓    |
