# Supplementary figures and images for: Chiroptical, ESMS and NMR spectroscopic study of the interaction of enantiopure lanthanide complexes with selected self-complementary dodecamer oligonucleotides†
Source: Royal Society of Chemistry journal article supplement (doi:10.1039/b104796p), 2001-01-01

Decrease in absorbance (321 nm) of SSS ( $\Delta$ ) europium complex upon addition of  $(CG)_6$

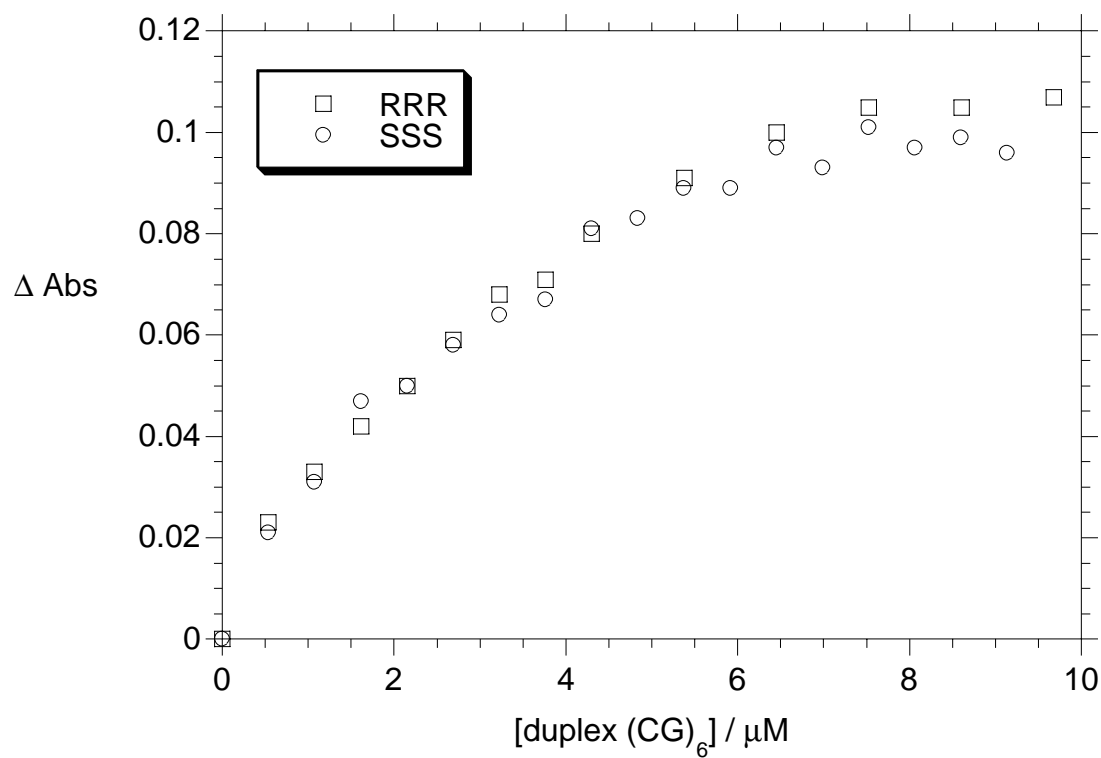

Supplement: b104796p_b.pdf [file b104796p_b.pdf]

SSS ( $\Delta$ ) + (CG)<sub>6</sub>

Change in fluorescence intensity as a function of [(CG)<sub>6</sub>]

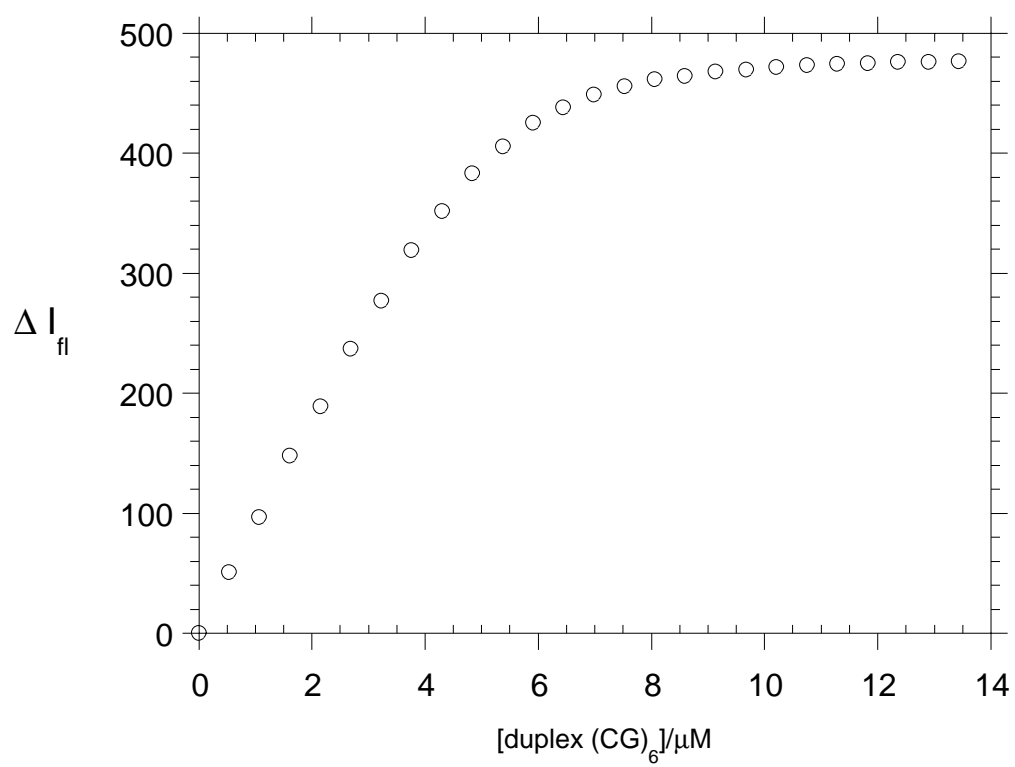

Supplement: b104796p_c.pdf [file b104796p_c.pdf]

SSS ( $\Delta$ ) + (CG)<sub>6</sub>  
McGhee-von Hippel plot

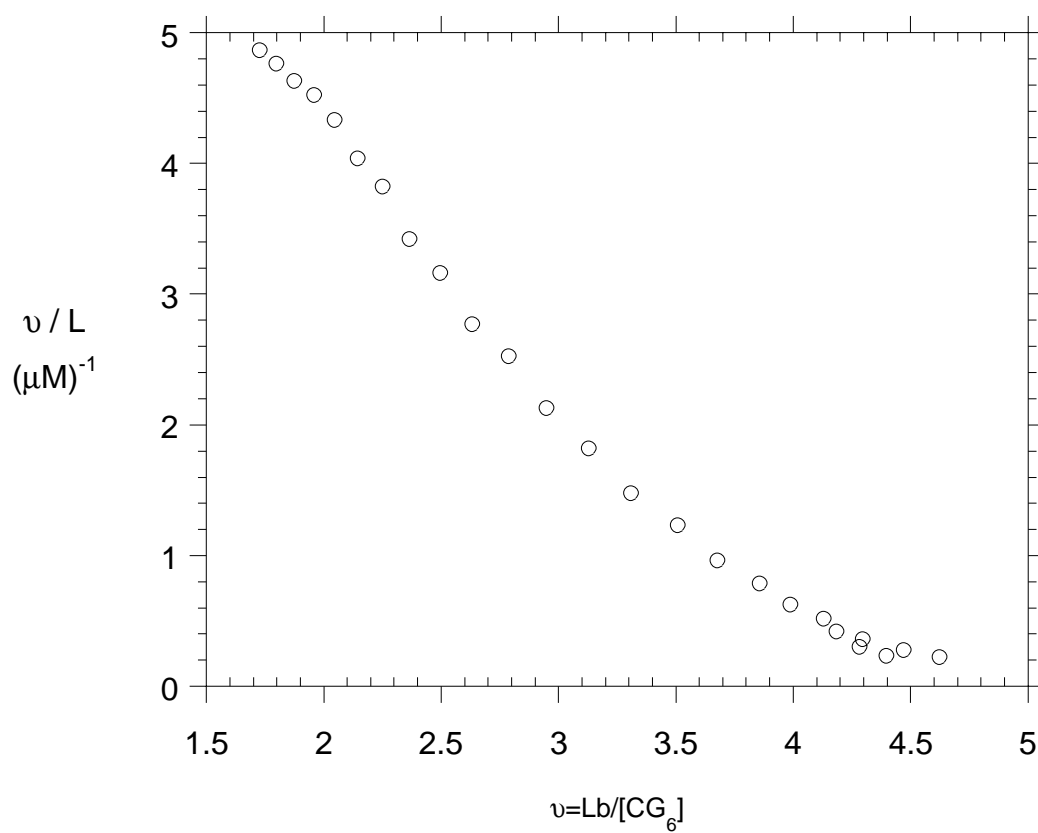

Supplement: b104796p_e.pdf [file b104796p_e.pdf]

SSS ( $\Delta$ ) + (CG)<sub>6</sub>: McGhee-von Hippel plot (central portion of curve).

Equation of best-fit line:  $y = -2.19x + 8.70$

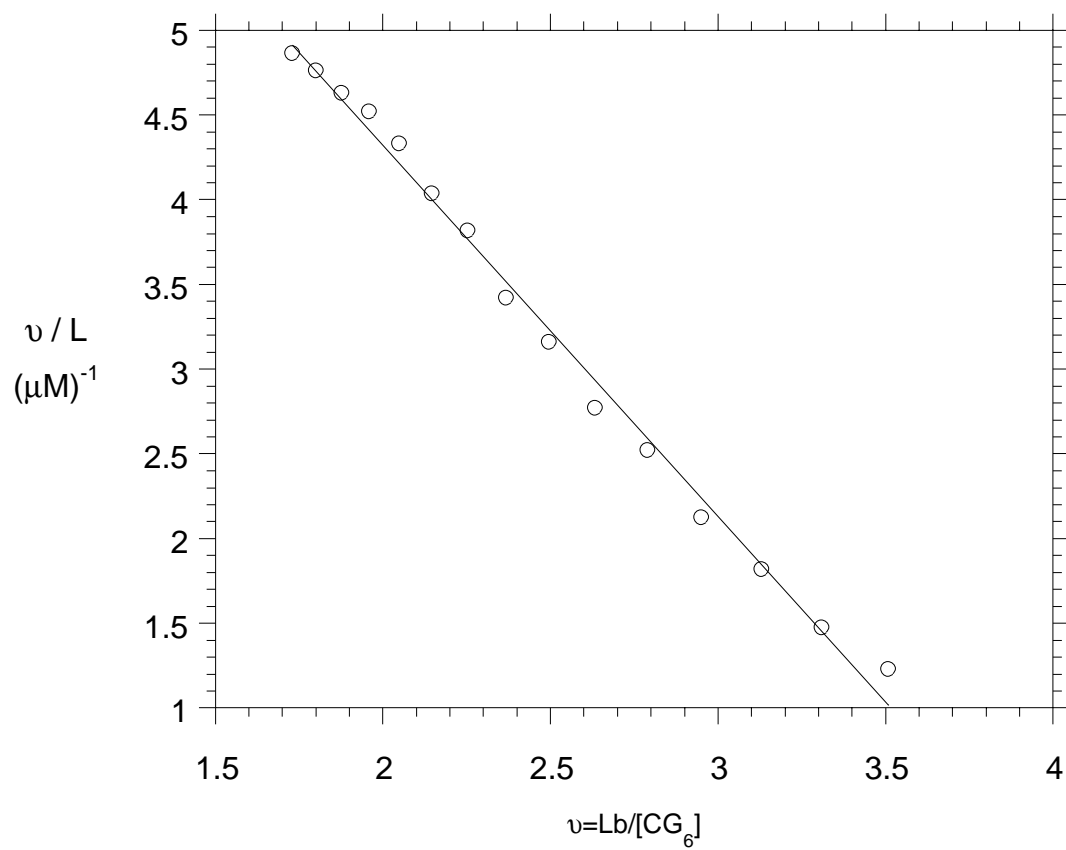

Supplement: b104796p_f.pdf [file b104796p_f.pdf]
